# Supplementary material for: Arbuscular Mycorrhizal Fungal Assemblages Significantly Shifted upon Bacterial Inoculation in Non-Contaminated and Petroleum-Contaminated Environments
Source: MDPI journal article supplement (doi:10.3390/microorganisms8040602), 2020-04-21
Supplement: s1 [file s1]

Supplementary material: figures S1-S4 and Details of the sequence processing pipeline  
Figure S1

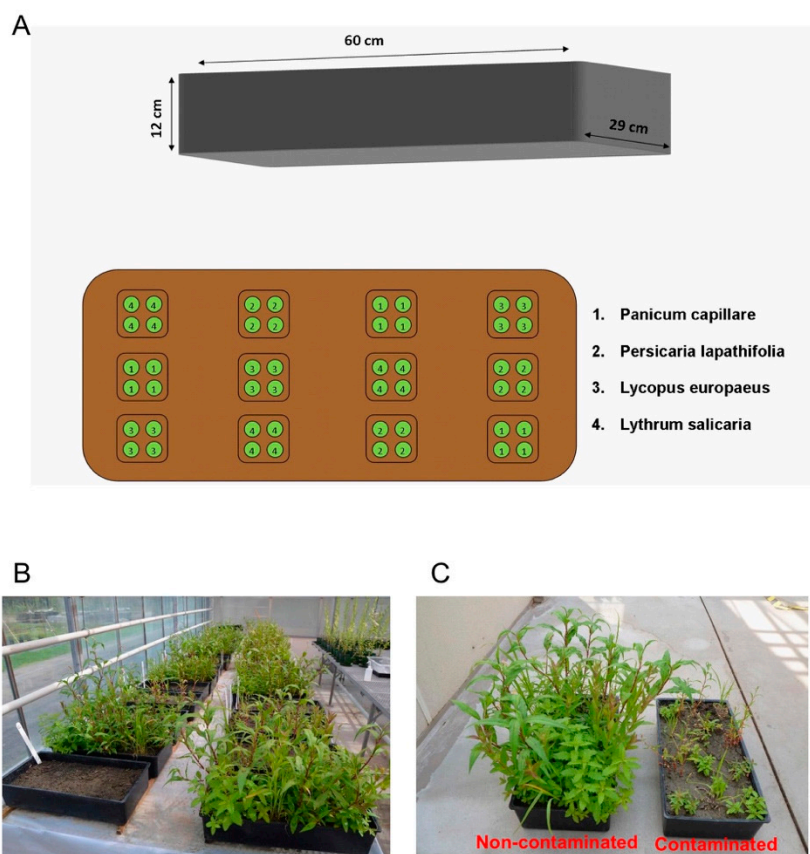

**Figure S1.** Planting scheme in each tray (A), experimental setup (B), and a comparison between the non-contaminated soil and contaminated sediments mesocosms (C).

**Figure S2**

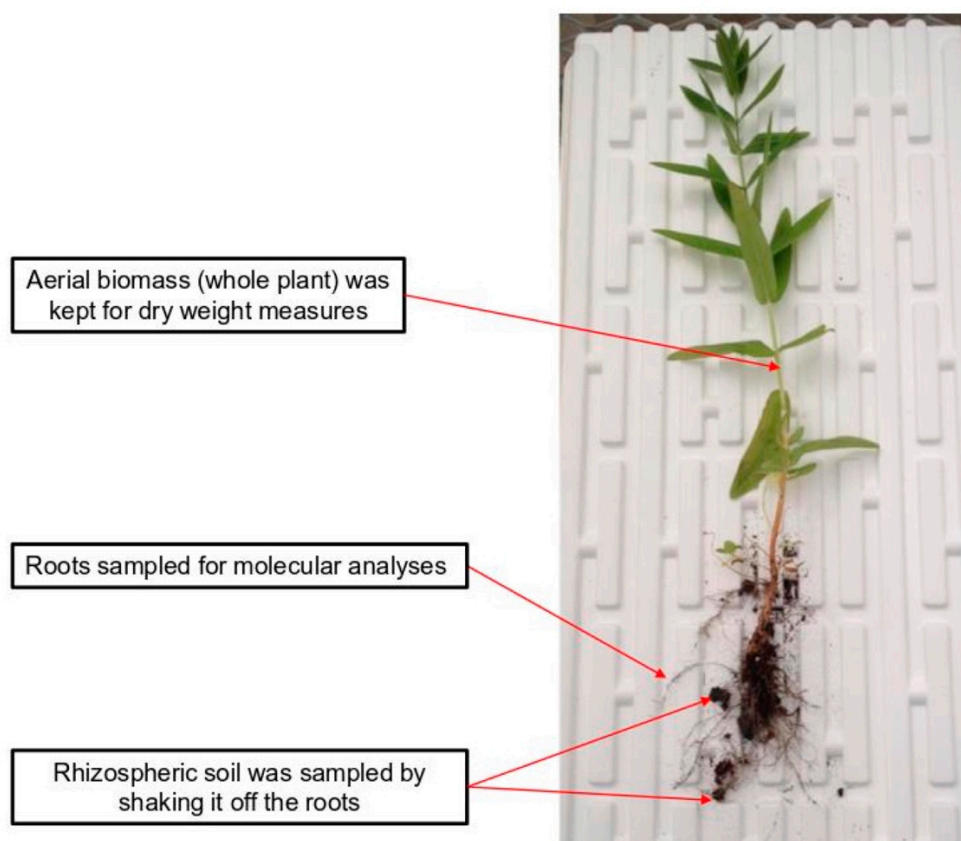

**Figure S2.** Plant sampling example from a *Persicaria lapathifolia*

**Figure S3**

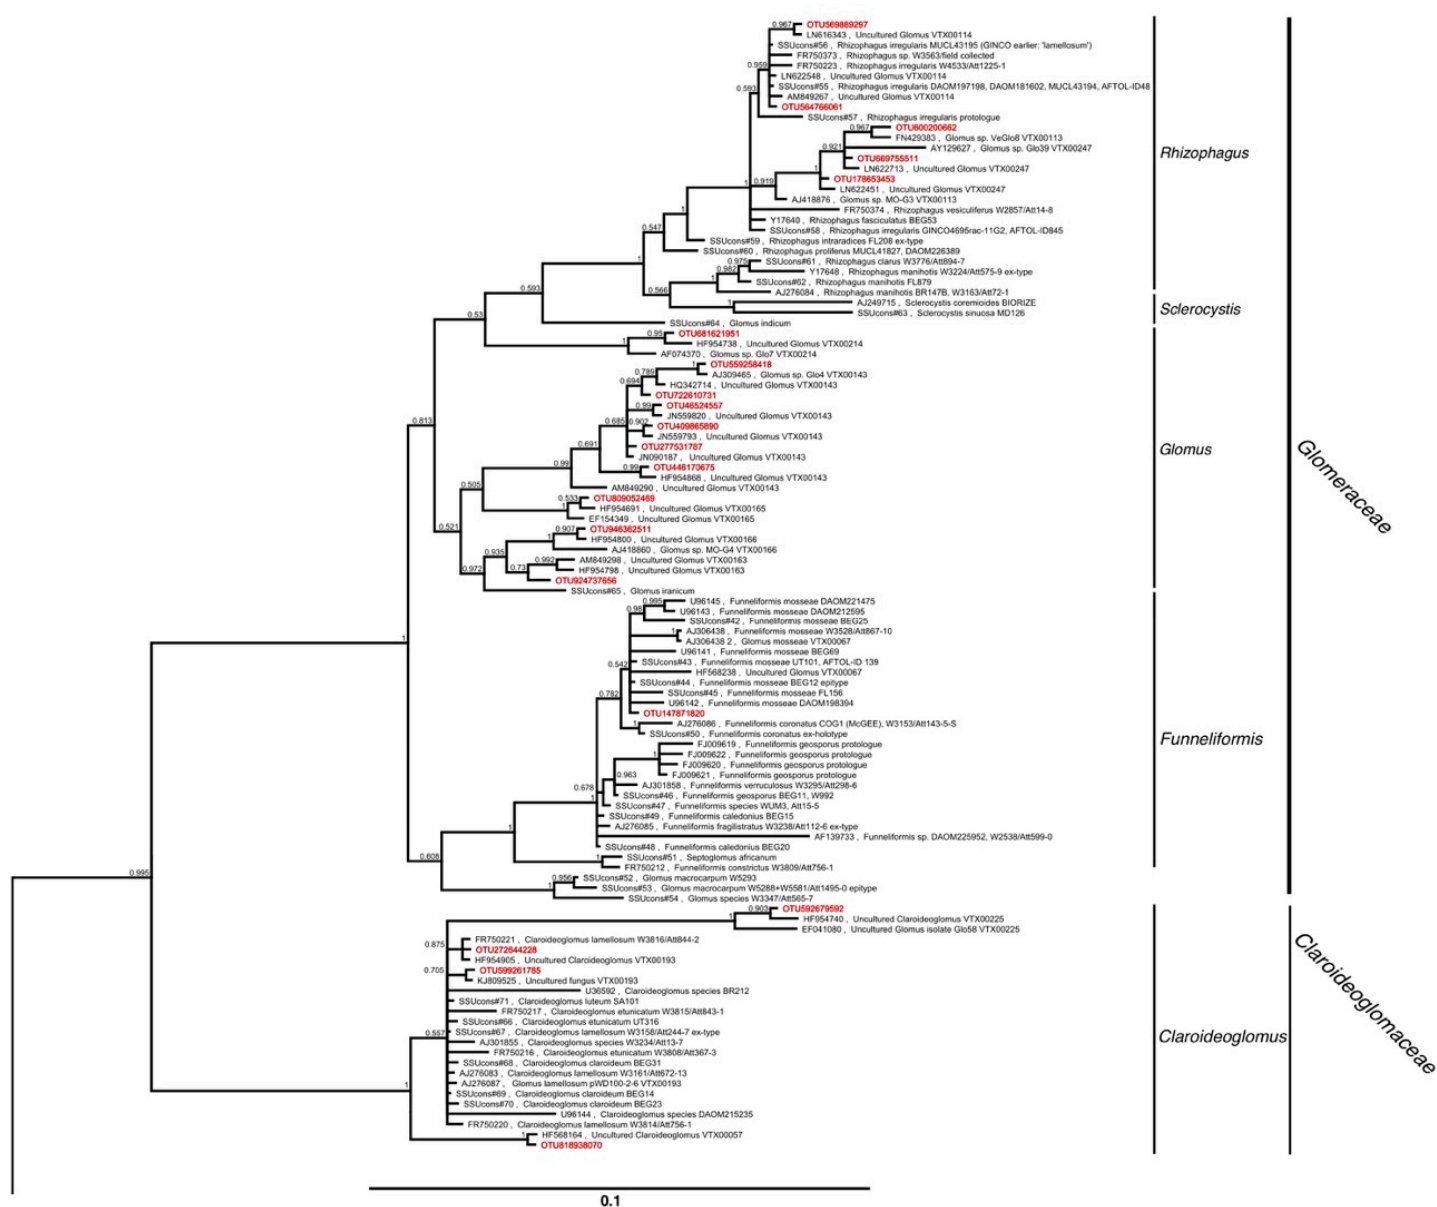





Figure S4

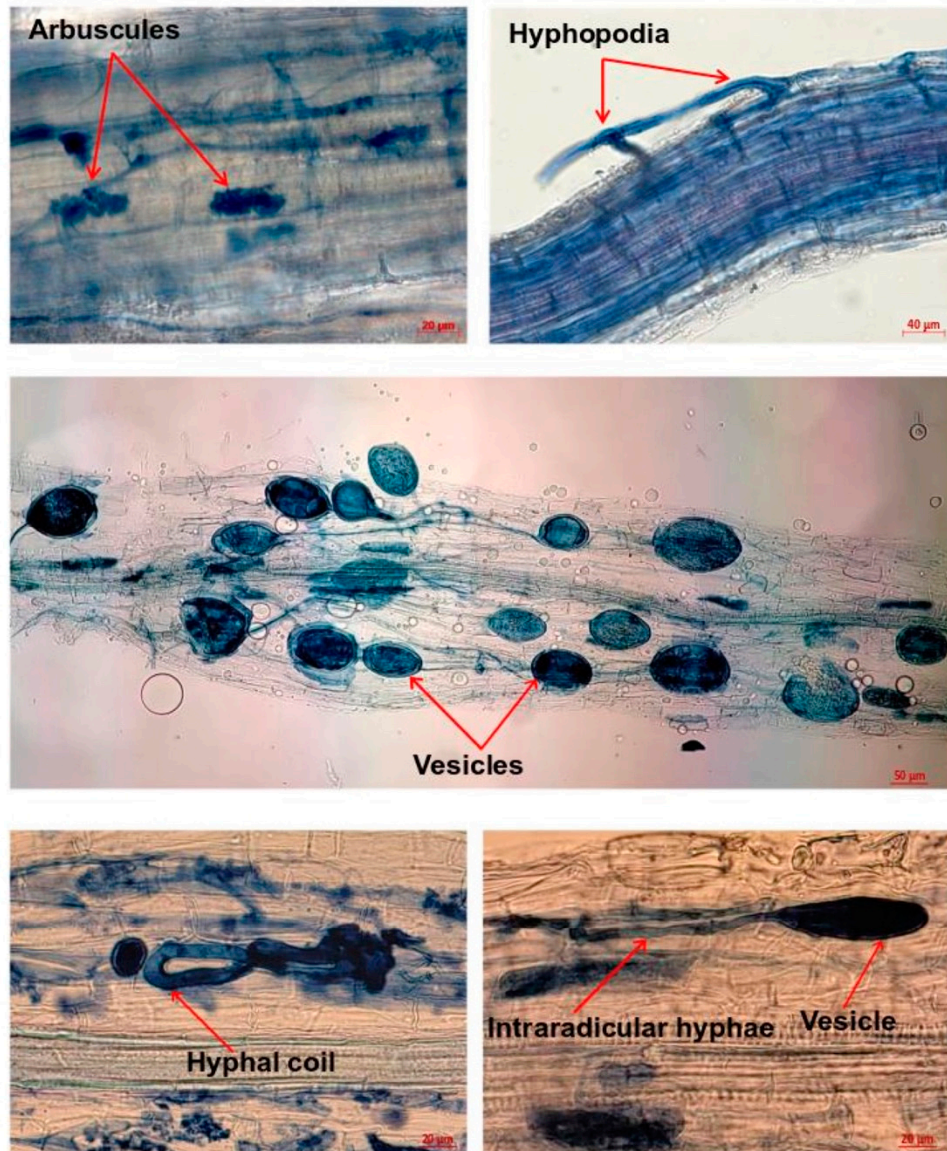

Figure S4. Mycorrhizal structures observed in the plant roots under light microscopy
