# Supplementary material for: Arbuscular Mycorrhizal Fungal Assemblages Significantly Shifted upon Bacterial Inoculation in Non-Contaminated and Petroleum-Contaminated Environments
Source: Microorganisms. 2020 Apr 21;8(4):602. doi: 10.3390/microorganisms8040602 (PMC7232219; doi:10.3390/microorganisms8040602)
Supplement: Supplementary file 1 [file microorganisms-08-00602-s001.zip › microorganisms-765617-supplementary.xlsx]

## Sheet: Table S1
Table S1. Basic chemical characteristics of the substrates
	Non-contaminated substrate	Contaminated substrate : Adapted from "Distribution patterns of spontaneous vegetation and pollution at a former decantation basin in southern Québec, Canada" (Desjardins et al 2014)
pH	6.5	6.9	7.3	7.1	7.7	7.3	7.5	7.6	7.3	7.5	7.7
Organic matter (%)	6.1	7.4	4.3	4.1	5.3	6.1	3.1	3.4	6.1	5.9	3.3
CEC (meq per 100 g)	24.6	24.1	24.5	23.1	29.8	28.1	22.6	35.3	21.5	28.9	31.9
Al (ppm)	850	899	869	900	762	717	894	753	618	761	806
Mg (kg ha−1)	1551	1553	1397	1455	1851	1425	2175	928	1965	1696	1745

## Sheet: Table S2
Table S2. Bacterial isolates selected for the inoculation of plants
Isolate code	Closest match	GenBank accession	Identity
C10	Duganella nigrescens strain YIM H16	EF584756	0.99
C17	Comamonadaceae bacterium KACHI12	LC094532	0.99
C19	Pelomonas aquatica strain CCUG 52575	NR_042614	0.99
C25	Massilia sp. DC2a-55	AB552860	0.99
C26	Massilia sp. PO12	KC687079	0.99
C30	Duganella sp. 13-D4	KU647207	0.99
C45	Janthinobacterium sp. HP12G1	KM187404	0.99
C53	Duganella sp. T53	KC464857	0.99
C55	Janthinobacterium sp. HME1	HQ829835	0.99
C65	Methylibium sp. YIM 61602	FJ615290	0.99

## Sheet: Table S3
Table S3. AMF taxa from the 18S sequences after subsampling (150 sequences)
LE: Lycopus europaeus; LS: Lythrum salicaria; PL: Persicaria lapathifolia; PC: Panicum capillare; B1: Block 1; B2: Block 2; B3: Block 3; B4: Block 4
Samples starting with: A: Non-contaminated and non-inoculated; B:contaminated and non-inoculated; C: Non-contaminated and inoculated; D: Contaminated and inoculated
Samples ending with a "z" come from the rhizosphere
#OTU ID	Concensus lineage	B1LE1	B1LE2	B1LE3	B2LE1	B2LE2	B2LE3	B3LE1	B3LE2	B3LE3	B4LE1	B4LE2	B4LE3	B1LS1	B2LS1	B2LS2	B2LS3	B3LS1	B4LS1	B4LS2	B4LS3	B1PC1	B1PC2	B1PC3	B2PC1	B2PC2	B2PC3	B3PC1	B3PC2	B3PC3	B4PC1	B4PC2	B4PC3	B1PL1	B1PL2	B1PL3	B2PL1	B2PL2	B2PL3	B3PL1	B3PL2	B3PL3	B4PL1	B4PL2	B4PL3	D1LE1	D1LE2	D1LE3	D2LE1
OTU614441426	Acaulospora sp. VTX00028	0	0	0	2	0	2	0	0	3	0	0	0	0	0	0	0	0	0	0	0	0	0	0	0	0	6	0	0	0	0	0	0	0	0	0	0	0	0	0	0	0	0	0	0	0	0	0	3
OTU818938070	Claroideoglomus sp. VTX00057	4	0	1	10	0	12	2	2	3	0	0	1	0	3	1	6	5	2	2	0	0	0	1	1	7	0	2	0	1	0	0	0	0	0	0	0	5	1	0	0	1	0	0	0	1	4	0	8
OTU272644228	Claroideoglomus sp. VTX00193	18	11	11	44	11	10	5	5	29	5	0	14	16	21	15	17	5	5	15	10	14	15	16	28	42	13	11	8	5	17	7	4	22	9	2	5	59	3	61	8	14	2	2	5	7	26	11	18
OTU599261785	Claroideoglomus sp. VTX00193	6	7	12	6	6	3	2	1	12	1	10	1	15	2	1	3	4	1	2	0	6	1	11	0	0	3	1	1	0	0	0	1	5	2	5	0	0	0	10	3	2	3	0	0	1	5	1	8
OTU592679592	Claroideoglomus sp. VTX00225	0	0	0	0	0	0	0	0	0	0	0	0	0	0	0	0	1	0	2	0	0	0	0	0	0	0	0	0	4	0	0	0	0	0	0	0	0	0	2	0	0	0	0	1	0	0	0	0
OTU327049662	Diversispora sp. VTX00054	0	0	0	0	0	0	0	0	0	0	0	0	1	0	0	0	0	0	0	0	0	0	0	0	0	0	0	0	0	0	0	0	0	0	0	0	0	0	0	0	0	0	0	0	0	0	0	4
OTU559258418	Glomus Glo4 VTX00143	0	0	1	0	0	0	0	0	0	0	0	0	3	1	2	1	3	0	2	3	0	0	0	0	0	0	0	0	19	0	0	0	0	0	0	0	0	0	2	0	0	0	0	1	0	0	0	0
OTU147871820	Glomus sp. VTX00067	0	0	0	2	0	0	0	1	0	1	0	3	0	4	0	0	0	0	0	0	0	0	0	4	12	4	0	0	0	0	0	0	0	0	0	4	0	0	0	0	3	0	0	8	0	0	0	0
OTU569889297	Glomus sp. VTX00114	65	65	80	29	49	56	94	99	70	89	72	55	70	50	104	90	109	76	77	100	106	86	88	103	39	31	80	132	4	85	122	96	87	75	129	139	63	103	33	127	104	125	115	122	45	43	56	53
OTU564766061	Glomus sp. VTX00114	36	22	15	10	8	5	16	10	8	15	3	8	7	21	4	10	2	5	6	7	23	9	9	1	8	1	5	1	11	7	3	8	35	57	12	1	14	1	3	6	16	10	9	1	20	13	15	3
OTU722610731	Glomus sp. VTX00143	0	0	0	0	0	0	0	0	0	0	0	0	0	0	0	0	0	0	1	1	0	0	0	0	0	0	0	0	3	0	0	0	0	0	0	0	0	0	0	0	0	0	0	0	0	0	0	0
OTU409865890	Glomus sp. VTX00143	0	0	0	0	0	0	0	0	0	0	0	0	1	0	0	0	1	0	2	0	0	0	0	0	0	0	0	0	2	0	0	0	0	0	0	0	0	0	0	0	0	0	0	1	0	0	0	0
OTU446170675	Glomus sp. VTX00143	0	0	0	0	0	0	0	0	0	0	1	0	3	0	0	0	1	1	0	0	0	0	0	0	0	0	0	0	4	0	0	0	0	0	0	0	0	0	0	0	0	0	0	0	0	0	0	0
OTU277531787	Glomus sp. VTX00143	0	0	0	0	0	0	0	0	0	0	0	0	3	1	0	0	1	0	0	1	0	0	0	0	0	0	0	0	3	0	0	0	0	0	0	0	0	0	1	0	0	0	0	1	0	0	0	0
OTU46524557	Glomus sp. VTX00143	0	0	0	0	0	0	0	0	0	0	0	0	4	0	0	0	4	1	1	0	0	0	0	0	0	0	0	0	2	0	0	0	0	0	0	0	0	0	0	0	0	0	0	0	0	0	0	0
OTU924737656	Glomus sp. VTX00163	0	0	0	2	0	0	0	0	0	4	25	6	1	4	0	2	0	0	3	3	0	0	2	6	5	0	0	0	0	26	4	17	0	0	0	0	4	0	7	0	0	0	0	2	2	22	2	0
OTU809052469	Glomus sp. VTX00165	11	35	15	5	0	0	17	23	19	4	0	4	10	1	1	0	5	3	0	1	0	27	18	1	0	86	42	6	0	1	0	0	0	3	1	0	0	0	9	3	7	0	0	0	2	1	8	36
OTU946362511	Glomus sp. VTX00166	4	3	7	40	70	54	5	3	0	15	28	48	3	33	18	18	6	47	20	16	0	10	0	1	34	3	0	1	0	5	5	12	0	3	0	1	1	35	20	0	0	4	15	4	51	26	48	11
OTU681621951	Glomus sp. VTX00214	0	0	0	0	0	0	0	0	0	0	0	0	0	0	0	0	0	1	1	0	0	0	0	0	0	0	0	0	4	0	0	0	0	0	0	0	0	0	0	0	0	1	0	0	0	0	0	0
OTU669755511	Glomus sp. VTX00247	2	1	1	0	0	2	0	1	0	1	0	1	0	0	0	1	0	0	0	0	0	0	1	2	0	1	0	0	6	3	3	7	0	0	0	0	1	1	0	0	1	2	1	0	6	3	4	0
OTU178653453	Glomus sp. VTX00247	3	5	5	0	1	2	2	0	0	11	11	5	5	7	3	0	0	7	12	7	1	1	2	0	2	0	0	1	55	5	2	3	1	1	0	0	1	0	1	2	1	1	5	1	9	1	1	0
OTU600200662	Glomus VeGlo8 VTX00113	1	1	2	0	5	4	7	5	6	4	0	4	0	0	1	0	0	1	0	1	0	1	2	3	1	2	9	0	0	1	4	2	0	0	1	0	2	6	0	1	1	2	3	1	6	6	4	6
OTU356658167	Paraglomus sp. VTX00281	0	0	0	0	0	0	0	0	0	0	0	0	8	2	0	2	3	0	4	0	0	0	0	0	0	0	0	0	27	0	0	0	0	0	0	0	0	0	1	0	0	0	0	2	0	0	0	0
[truncated: 320 more columns]

## Sheet: Table S4
Table S4. ANOVA analysis output from JMP for Shannon's index
Least square fit
RSquare	0.53206
RSquare Adj	0.488887
Root Mean Square Error	0.810939
Mean of Response	-0.71524
Observations (or Sum Wgts)	368
Analysis of Variance
Source	DF	Sum of Squares	Mean Square	F Ratio	Prob > F
Model	31	251.239	8.10448	12.3239	<.0001
Error	336	220.961	0.65762
C. Total	367	472.2
Effect Tests
Source	Nparm	DF	Sum of Squares	F Ratio	Prob > F
Plant Species	3	3	7.90682	4.0078	0.008*
Inoculation	1	1	7.61772	11.5837	0.0007*
Biotope	1	1	19.9661	30.361	<.0001*
Contamination	1	1	182.359	277.3	<.0001*
Plant Species*Inoculation	3	3	2.48731	1.2608	0.2878
Plant Species*Biotope	3	3	11.5666	5.8629	0.0007*
Plant Species*Contamination	3	3	5.17885	2.625	0.0504
Inoculation*Biotope	1	1	0.51844	0.7884	0.3752
Inoculation*Contamination	1	1	2.97474	4.5235	0.0342*
Biotope*Contamination	1	1	3.96226	6.0251	0.0146*
Plant Species*Inoculation*Biotope	3	3	1.25516	0.6362	0.5921
Plant Species*Inoculation*Contamination	3	3	0.56899	0.2884	0.8338
Plant Species*Biotope*Contamination	3	3	1.52096	0.7709	0.5109
Inoculation*Biotope*Contamination	1	1	0.04678	0.0711	0.7898
Plant Species*Inoculation*Biotope*Contamination	3	3	2.77613	1.4072	0.2405
Df: degree of freedom; SumsOfSqs: Sums of squares; Meansqs: Mean squares; F.Model: F-test value for model; R2: R-squared; Pr(>F): p-value.
Post hoc tests results
Factor	Level	Connecting letters
Plant Species*Biotope	LE,Roots	A
Plant Species*Biotope	LS,Roots	A
Plant Species*Biotope	PC,Roots	AB
Plant Species*Biotope	PL,Roots	B
Plant Species*Biotope	LS,Rhizo	A
Plant Species*Biotope	PL,Rhizo	A
Plant Species*Biotope	PC,Rhizo	A
Plant Species*Biotope	LE,Rhizo	A
Inoculation*Contamination	Non-contaminated, Inoculated	A
Inoculation*Contamination	Non-contaminated, Non-inoculated	B
Inoculation*Contamination	Contaminated, Inoculated	A
Inoculation*Contamination	Contaminated, Non-inoculated	A
Biotope*Contamination	Non-contaminated, Roots	A
Biotope*Contamination	Non-contaminated, Rhizo	B
Biotope*Contamination	Contaminated, Roots	A
Biotope*Contamination	Contaminated, Rhizo	A

## Sheet: Table S5
Table S5. ANOVA analysis output from JMP for the Chao1 diversity index
Least square fit
RSquare	0.453497
RSquare Adj	0.403075
Root Mean Square Error	0.92947
Mean of Response	-0.64434
Observations (or Sum Wgts)	368
Analysis of Variance
Source	DF	Sum of Squares	Mean Square	F Ratio	Prob > F
Model	31	240.875	7.77016	8.9941	<.0001
Error	336	290.276	0.86392
C. Total	367	531.15
Effect Tests
Source	Nparm	DF	Sum of Squares	F Ratio	Prob > F
Plant Species	3	3	10.0229	3.8672	0.0096*
Inoculation	1	1	0.12131	0.1404	0.7081
Biotope	1	1	10.3317	11.9592	0.0006*
Contamination	1	1	138.375	160.172	<.0001*
Plant Species*Inoculation	3	3	8.17625	3.1547	0.025*
Plant Species*Biotope	3	3	25.713	9.9211	<.0001*
Plant Species*Contamination	3	3	12.6879	4.8955	0.0024*
Inoculation*Biotope	1	1	2.05688	2.3809	0.1238
Inoculation*Contamination	1	1	0.98613	1.1415	0.2861
Biotope*Contamination	1	1	0.00458	0.0053	0.942
Plant Species*Inoculation*Biotope	3	3	8.65892	3.341	0.0195*
Plant Species*Inoculation*Contamination	3	3	6.35534	2.4521	0.0633
Plant Species*Biotope*Contamination	3	3	11.6106	4.4798	0.0042*
Inoculation*Biotope*Contamination	1	1	5.63919	6.5275	0.0111*
Plant Species*Inoculation*Biotope*Contamination	3	3	5.50858	2.1254	0.0968
Df: degree of freedom; SumsOfSqs: Sums of squares; Meansqs: Mean squares; F.Model: F-test value for model; R2: R-squared; Pr(>F): p-value.
Post hoc tests results
Factor	Level	Connecting letters
Plant Species*Inoculation	LS,Non-inoculated	A
Plant Species*Inoculation	LE,Non-inoculated	AB
Plant Species*Inoculation	PL,Non-inoculated	B
Plant Species*Inoculation	PC,Non-inoculated	B
Plant Species*Inoculation	LE,Inoculated	A
Plant Species*Inoculation	LS,Inoculated	A
Plant Species*Inoculation	PC,Inoculated	A
Plant Species*Inoculation	PL,Inoculated	A
Plant Species*Biotope	LS,Roots	A
Plant Species*Biotope	LE,Roots	B
Plant Species*Biotope	PC,Roots	BC
Plant Species*Biotope	PL,Roots	C
Plant Species*Biotope	LE,Rhizo	A
Plant Species*Biotope	PL,Rhizo	A
Plant Species*Biotope	PC,Rhizo	AB
Plant Species*Biotope	LS,Rhizo	B
Plant Species*Contamination	LE,Non-contaminated	A
Plant Species*Contamination	PL,Non-contaminated	A
Plant Species*Contamination	LS,Non-contaminated	A
Plant Species*Contamination	PC,Non-contaminated	A
Plant Species*Contamination	LS,Contaminated	A
Plant Species*Contamination	LE,Contaminated	AB
Plant Species*Contamination	PC,Contaminated	B
Plant Species*Contamination	PL,Contaminated	B
Plant Species*Inoculation*Biotope	LS,Non-inoculated,Roots	A
Plant Species*Inoculation*Biotope	LE,Non-inoculated,Roots	B
Plant Species*Inoculation*Biotope	PC,Non-inoculated,Roots	B
Plant Species*Inoculation*Biotope	PL,Non-inoculated,Roots	B
Plant Species*Inoculation*Biotope	LE,Inoculated,Roots	A
Plant Species*Inoculation*Biotope	LS,Inoculated,Roots	A
Plant Species*Inoculation*Biotope	PC,Inoculated,Roots	A
Plant Species*Inoculation*Biotope	PL,Inoculated,Roots	A
Plant Species*Inoculation*Biotope	PL,Inoculated,Rhizo	A
Plant Species*Inoculation*Biotope	PC,Inoculated,Rhizo	A
Plant Species*Inoculation*Biotope	LE,Inoculated,Rhizo	A
Plant Species*Inoculation*Biotope	LS,Inoculated,Rhizo	A
Plant Species*Inoculation*Biotope	LE,Non-inoculated,Rhizo	A
Plant Species*Inoculation*Biotope	PL,Non-inoculated,Rhizo	A
Plant Species*Inoculation*Biotope	LS,Non-inoculated,Rhizo	A
Plant Species*Inoculation*Biotope	PC,Non-inoculated,Rhizo	A
Plant Species*Biotope*Contamination	LS,Roots,Non-contaminated	A
Plant Species*Biotope*Contamination	LE,Roots,Non-contaminated	A
Plant Species*Biotope*Contamination	PC,Roots,Non-contaminated	A
Plant Species*Biotope*Contamination	PL,Roots,Non-contaminated	A
Plant Species*Biotope*Contamination	PL,Rhizo,Non-contaminated	A
Plant Species*Biotope*Contamination	LE,Rhizo,Non-contaminated	A
Plant Species*Biotope*Contamination	LS,Rhizo,Non-contaminated	A
Plant Species*Biotope*Contamination	PC,Rhizo,Non-contaminated	A
Plant Species*Biotope*Contamination	LS,Roots,Contaminated	A
Plant Species*Biotope*Contamination	LE,Roots,Contaminated	B
Plant Species*Biotope*Contamination	PC,Roots,Contaminated	B
Plant Species*Biotope*Contamination	PL,Roots,Contaminated	B
Plant Species*Biotope*Contamination	PC,Rhizo,Contaminated	A
Plant Species*Biotope*Contamination	LE,Rhizo,Contaminated	A
Plant Species*Biotope*Contamination	PL,Rhizo,Contaminated	A
Plant Species*Biotope*Contamination	LS,Rhizo,Contaminated	A
Inoculation*Biotope*Contamination	Inoculated,Roots,Non-contaminated	A
Inoculation*Biotope*Contamination	Non-inoculated,Roots,Non-contaminated	A
Inoculation*Biotope*Contamination	Inoculated,Rhizo,Non-contaminated	A
Inoculation*Biotope*Contamination	Non-inoculated,Rhizo,Non-contaminated	A
Inoculation*Biotope*Contamination	Non-inoculated,Roots,Contaminated	A
Inoculation*Biotope*Contamination	Inoculated,Roots,Contaminated	A
Inoculation*Biotope*Contamination	Inoculated,Rhizo,Contaminated	A
Inoculation*Biotope*Contamination	Non-inoculated,Rhizo,Contaminated	B

## Sheet: Table S6
Table S6. ANOVA analysis output from JMP for Pielou's equitabilty index
Least squares fit
RSquare	0.354191
RSquare Adj	0.294607
Root Mean Square Error	0.896292
Mean of Response	-0.49008
Observations (or Sum Wgts)	368
Analysis of Variance
Source	DF	Sum of Squares	Mean Square	F Ratio	Prob > F
Model	31	148.037	4.7754	5.9444	<.0001
Error	336	269.922	0.80334
C. Total	367	417.96
Effect Tests
Source	Nparm	DF	Sum of Squares	F Ratio	Prob > F
Plant Species	3	3	5.53391	2.2962	0.0775
Inoculation	1	1	6.9829	8.6923	0.0034*
Biotope	1	1	7.44886	9.2724	0.0025*
Contamination	1	1	88.2663	109.874	<.0001*
Plant Species*Inoculation	3	3	1.88634	0.7827	0.5043
Plant Species*Biotope	3	3	12.1804	5.0541	0.0019*
Plant Species*Contamination	3	3	3.28582	1.3634	0.2538
Inoculation*Biotope	1	1	1.57792	1.9642	0.162
Inoculation*Contamination	1	1	2.68433	3.3415	0.0684
Biotope*Contamination	1	1	9.42058	11.7268	0.0007*
Plant Species*Inoculation*Biotope	3	3	0.469893	0.195	0.8998
Plant Species*Inoculation*Contamination	3	3	0.994703	0.4127	0.744
Plant Species*Biotope*Contamination	3	3	5.71472	2.3712	0.0703
Inoculation*Biotope*Contamination	1	1	1.83642	2.286	0.1315
Plant Species*Inoculation*Biotope*Contamination	3	3	1.24072	0.5148	0.6723
Df: degree of freedom; SumsOfSqs: Sums of squares; Meansqs: Mean squares; F.Model: F-test value for model; R2: R-squared; Pr(>F): p-value.
Post hoc tests results
Factor	Level	Connecting letters
Inoculation	Inoculated	A
Inoculation	Non-inoculated	B
Plant Species*Biotope	LE,Roots	A
Plant Species*Biotope	PC,Roots	AB
Plant Species*Biotope	LS,Roots	AB
Plant Species*Biotope	PL,Roots	B
Plant Species*Biotope	LS,Rhizo	A
Plant Species*Biotope	PC,Rhizo	A
Plant Species*Biotope	PL,Rhizo	A
Plant Species*Biotope	LE,Rhizo	A
Biotope*Contamination	Roots,Non-contaminated	A
Biotope*Contamination	Rhizo,Non-contaminated	B
Biotope*Contamination	Rhizo,Contaminated	A
Biotope*Contamination	Roots,Contaminated	A

## Sheet: Table S7
Table S7. Permanova analysis of the AMF communities based on the Bray-Curtis dissimilarity matrix
Each of the following tables presents the analysis on different combination of the dataset, as required by the interactions between factors
All dataset	Df	SumsOfSqs	MeanSqs	F.Model	R2	Pr(>F)
Contamination	1	40.718	40.718	427.43	0.52649	0.001*
Biotope	1	0.741	0.741	7.78	0.00958	0.002*
Inoculation	1	0.107	0.107	1.13	0.00139	0.332
Plant Species	3	0.316	0.105	1.1	0.00408	0.319
Contamination:Biotope	1	0.845	0.845	8.87	0.01092	0.001*
Contamination:Inoculation	1	0.144	0.144	1.51	0.00186	0.18
Biotope:Inoculation	1	0.217	0.217	2.28	0.0028	0.071	.
Contamination:Plant Species	3	0.24	0.08	0.84	0.0031	0.558
Biotope:Plant Species	3	0.213	0.071	0.74	0.00275	0.663
Inoculation:Plant Species	3	0.301	0.1	1.05	0.00389	0.382
Contamination:Biotope:Inoculation	1	0.16	0.16	1.68	0.00207	0.146
Contamination:Biotope:Plant Species	3	0.245	0.082	0.86	0.00317	0.517
Contamination:Inoculation:Plant Species	3	0.213	0.071	0.74	0.00275	0.601
Biotope:Inoculation:Plant Species	3	0.388	0.129	1.36	0.00501	0.197
Contamination:Biotope:Inoculation:Plant Species	3	0.484	0.161	1.69	0.00626	0.089	.
Residuals	336	32.009	0.095	0.41387
Total	367	77.339	1
Df: degree of freedom; SumsOfSqs: Sums of squares; Meansqs: Mean squares; F.Model: F-test value for model; R2: R-squared; Pr(>F): p-value.
Non-contaminated soil	Df	SumsOfSqs	MeanSqs	F.Model	R2	Pr(>F)
Inoculation	1	0.0881	0.08806	1.014	0.00539	0.38
Plant Species	3	0.3263	0.10878	1.2525	0.01998	0.183
Biotope	1	0.496	0.49599	5.711	0.03037	0.001*
Inoculation:Plant Species	3	0.2865	0.09551	1.0997	0.01754	0.332
Inoculation:Biotope	1	0.1834	0.18337	2.1114	0.01123	0.042*
Plant Species:Biotope	3	0.2439	0.08129	0.9361	0.01493	0.479
Inoculation:Plant Species:Biotope	3	0.2909	0.09696	1.1164	0.01781	0.289
Residuals	166	14.4167	0.08685		0.88274
Total	181	16.3317			1
Df: degree of freedom; SumsOfSqs: Sums of squares; Meansqs: Mean squares; F.Model: F-test value for model; R2: R-squared; Pr(>F): p-value.
Contaminated substrate	Df	SumsOfSqs	MeanSqs	F.Model	R2	Pr(>F)
Inoculation	1	0.0897	0.08973	0.9257	0.00478	0.42
Plant Species	3	0.132	0.04401	0.454	0.00704	0.963
Biotope	1	1.076	1.07604	11.1011	0.05737	0.001*
Inoculation:Plant Species	3	0.2963	0.09876	1.0189	0.0158	0.381
Inoculation:Biotope	1	0.184	0.184	1.8983	0.00981	0.074
Plant Species:Biotope	3	0.2095	0.06985	0.7206	0.01117	0.75
Inoculation:Plant Species:Biotope	3	0.2915	0.09718	1.0026	0.01554	0.42
Residuals	170	16.4783	0.09693	0.87849	0.87849
Total	185	18.7575	1
Df: degree of freedom; SumsOfSqs: Sums of squares; Meansqs: Mean squares; F.Model: F-test value for model; R2: R-squared; Pr(>F): p-value.
Roots Only	Df	SumsOfSqs	MeanSqs	F.Model	R2	Pr(>F)
Contamination	1	0.123	0.1233	1.474	0.00378	0.191
Inoculation	1	16.689	16.6887	199.565	0.51202	0.001*
Plant Species	3	0.685	0.2282	2.729	0.02101	0.015*
Contamination:Inoculation	1	0.377	0.3767	4.504	0.01156	0.016*
Contamination:Plant Species	3	0.38	0.1267	1.515	0.01166	0.154
Inoculation:Plant Species	3	0.376	0.1253	1.499	0.01154	0.145
Contamination:Inoculation:Plant Species	3	0.25	0.0832	0.995	0.00766	0.373
Residuals	164	13.715	0.0836	0.42077
Total	179	32.594	1
Df: degree of freedom; SumsOfSqs: Sums of squares; Meansqs: Mean squares; F.Model: F-test value for model; R2: R-squared; Pr(>F): p-value.
Rhizosphere Only	Df	SumsOfSqs	MeanSqs	F.Model	R2	Pr(>F)
Contamination	1	0.135	0.1347	1.91	0.00338	0.155
Inoculation	1	26.039	26.039	369.82	0.65294	0.001*
Plant Species	3	0.351	0.1169	1.66	0.0088	0.136
Contamination:Inoculation	1	0.39	0.3898	5.54	0.00977	0.014*
Contamination:Plant Species	3	0.218	0.0726	1.03	0.00546	0.362
Inoculation:Plant Species	3	0.46	0.1533	2.18	0.01153	0.048*
Contamination:Inoculation:Plant Species	3	0.177	0.0591	0.84	0.00444	0.494
Residuals	172	12.111	0.0704	0.30368
Total	187	39.88	1
Df: degree of freedom; SumsOfSqs: Sums of squares; Meansqs: Mean squares; F.Model: F-test value for model; R2: R-squared; Pr(>F): p-value.
Non-contaminated soil, roots data	Df	SumsOfSqs	MeanSqs	F.Model	R2	Pr(>F)
Inoculation	1	0.2758	0.275798	3.3266	0.03424	0.003*
Plant Species	3	0.7645	0.254824	3.0737	0.09491	0.001*
Inoculation:Plant Species	3	0.3822	0.127403	1.5367	0.04745	0.065
Residuals	80	6.6325	0.082906		0.8234
Total	87	8.0549			1
Df: degree of freedom; SumsOfSqs: Sums of squares; Meansqs: Mean squares; F.Model: F-test value for model; R2: R-squared; Pr(>F): p-value.
Non-contaminated soil, rhizosphere data	Df	SumsOfSqs	MeanSqs	F.Model	R2	Pr(>F)
Inoculation	1	0.3486	0.34857	7.5849	0.07229	0.001*
Plant Species	3	0.3232	0.10772	2.3441	0.06702	0.003*
Inoculation:Plant Species	3	0.198	0.066	1.4361	0.04106	0.104
Residuals	86	3.9522	0.04596		0.81963
Total	93	4.822			1
Df: degree of freedom; SumsOfSqs: Sums of squares; Meansqs: Mean squares; F.Model: F-test value for model; R2: R-squared; Pr(>F): p-value.
Contaminated substrate, roots data	Df	SumsOfSqs	MeanSqs	F.Model	R2	Pr(>F)
Inoculation	1	0.1415	0.141482	1.9961	0.02032	0.028*
Plant Species	3	0.6755	0.225162	3.1767	0.09702	0.001*
Inoculation:Plant Species	3	0.1915	0.063833	0.9006	0.0275	0.466
Residuals	84	5.9539	0.07088		0.85515
Total	91	6.9624			1
Df: degree of freedom; SumsOfSqs: Sums of squares; Meansqs: Mean squares; F.Model: F-test value for model; R2: R-squared; Pr(>F): p-value.
Contaminated substrate, rhizosphere data	Df	SumsOfSqs	MeanSqs	F.Model	R2	Pr(>F)
Inoculation	1	0.136	0.13601	1.6786	0.0178	0.101
Plant Species	3	0.449	0.149677	1.8473	0.05877	0.009*
Inoculation:Plant Species	3	0.0879	0.029307	0.3617	0.01151	0.989
Residuals	86	6.968	0.081023		0.91193
Total	93	7.641			1
Df: degree of freedom; SumsOfSqs: Sums of squares; Meansqs: Mean squares; F.Model: F-test value for model; R2: R-squared; Pr(>F): p-value.

## Sheet: Table S8
Table S8 . Plant dry biomass production
Summary of fit
RSquare	0.929904
RSquare Adj	0.923895
Root Mean Square Error	2.27193
Mean of Response	5.41539
Observations (or Sum Wgts)	191
Analysis of Variance
Source	DF	Sum of Squares	Mean Square	F Ratio	Prob > F
Model	15	11968.3	797.89	154.404	<.0001*
Error	175	904.319	5.168
C. Total	190	12872.7
Effect test
Source	Nparm	DF	DFDen	F Ratio	Prob > F
Plant Species	3	3	172	284.317	<.0001*
Inoculation	1	1	172	8.3672	0.0043*
Contamination	1	1	172	619.205	<.0001*
Plant Species*Inoculation	3	3	172	1.5974	0.1918
Plant Species*Contamination	3	3	172	272.809	<.0001*
Inoculation*Contamination	1	1	172	3.1963	0.0756
Plant Species*Inoculation*Contamination	3	3	172	1.3906	0.2474
Post hoc tests results
Factor	Level	Connecting letters
Inoculation	Inoculated	A
Inoculation	Non-inoculated	B
Plant Species*Contamination	Persicaria lapathifolia,Non-contaminated	A
Plant Species*Contamination	Lycopus europaeus,Non-contaminated	B
Plant Species*Contamination	Lythrum salicaria,Non-contaminated	BC
Plant Species*Contamination	Panicum capillare,Non-contaminated	C
Plant Species*Contamination	Lycopus europaeus,Contaminated	A
Plant Species*Contamination	Persicaria lapathifolia,Contaminated	A
Plant Species*Contamination	Lythrum salicaria,Contaminated	A
Plant Species*Contamination	Panicum capillare,Contaminated	A

## Sheet: Table S9
Table S9. ANOVA analysis output from JMP for AMF root colonization percentages
Global model
Summary of fit
RSquare	0.553992
RSquare Adj	0.513446
Root Mean Square Error	15.1575
Mean of Response	32.2425
Observations (or Sum Wgts)	181
Analysis of variance
Source	DF	Sum of Squares	Mean Square	F Ratio
Model	15	47086.6	3139.11	13.6632
Error	165	37908.5	229.75	Prob > F
C. Total	180	84995.1		<.0001*
Effect test
Source	DF	DFDen	F Ratio	Prob > F
Inoculation	1	164	13.7175	0.0003*
Plant Species	3	164	15.2786	<.0001*
Inoculation*Plant Species	3	164	1.8034	0.1486
Contamination	1	164	131.947	<.0001*
Inoculation*Contamination	1	164	10.8649	0.0012*
Plant Species*Contamination	3	164	7.3439	0.0001*
Inoculation*Plant Species*Contamination	3	164	0.1769	0.9119
Df: degree of freedom; SumsOfSqs: Sums of squares; Meansqs: Mean squares; F.Model: F-test value for model; R2: R-squared; Pr(>F): p-value.
Post hoc tests results
Factor	Level	Connecting letters
Inoculation*Contamination	Inoculated,Contaminated	A
Inoculation*Contamination	Non-inoculated,Contaminated	B
Inoculation*Contamination	Inoculated,Non-contaminated	C
Inoculation*Contamination	Non-inoculated,Non-contaminated	C
Inoculation*Contamination	Inoculated,Contaminated	A
Inoculation*Contamination	Inoculated,Non-contaminated	C
Inoculation*Contamination	Non-inoculated,Contaminated	B
Inoculation*Contamination	Non-inoculated,Non-contaminated	C
Plant Species*Contamination	Lythrum salicaria,Contaminated	A
Plant Species*Contamination	Lycopus europaeus,Contaminated	A
Plant Species*Contamination	Panicum capillare,Contaminated	B
Plant Species*Contamination	Persicaria lapathifolia,Contaminated	BC
Plant Species*Contamination	Lycopus europaeus,Non-contaminated	BCD
Plant Species*Contamination	Lythrum salicaria,Non-contaminated	CD
Plant Species*Contamination	Panicum capillare,Non-contaminated	CD
Plant Species*Contamination	Persicaria lapathifolia,Non-contaminated	D
Plant Species*Contamination	Lythrum salicaria,Contaminated	A
Plant Species*Contamination	Lythrum salicaria,Non-contaminated	CD
Plant Species*Contamination	Lycopus europaeus,Contaminated	A
Plant Species*Contamination	Lycopus europaeus,Non-contaminated	BCD
Plant Species*Contamination	Panicum capillare,Contaminated	B
Plant Species*Contamination	Panicum capillare,Non-contaminated	CD
Plant Species*Contamination	Persicaria lapathifolia,Contaminated	BC
Plant Species*Contamination	Persicaria lapathifolia,Non-contaminated	D
